# Supplementary material
Source: publisher figshare collection journal article supplement (https://karger.figshare.com/articles/dataset/_/5123611)
Supplement: Supplementary file 1 [file 1]

**Supplemental table1 Parameters in the ring analysis on the multifocal electroretinogram**

| ring  | N1-P1 amplitude<br>(nV/deg^2) |          |           | N1 latency (msec) |          |           | P1 latency (msec) |          |           |
|-------|-------------------------------|----------|-----------|-------------------|----------|-----------|-------------------|----------|-----------|
|       | right eye                     | left eye | R/L ratio | right eye         | left eye | R/L ratio | right eye         | left eye | R/L ratio |
| 1     | 45.7                          | 58.9     | 0.78      | 14.2              | 16.7     | 0.85      | 30.8              | 25.8     | 1.19      |
| 2     | 13.2                          | 39.7     | 0.33      | 13.3              | 15       | 1.19      | 32.5              | 28.3     | 1.15      |
| 3     | n.d.                          | 30.3     |           | n.d.              | 15       |           | n.d.              | 29.2     |           |
| 4     | n.d.                          | 23.6     |           | n.d.              | 15       |           | n.d.              | 28.3     |           |
| 5     | n.d.                          | 22.1     |           | n.d.              | 15       |           | n.d.              | 28.3     |           |
| total | n.d.                          | 24.8     |           | n.d.              | 15       |           | n.d.              | 28.3     |           |

n.d. : not detectable
