# Supplementary material
Source: publisher figshare collection journal article supplement (https://karger.figshare.com/articles/dataset/_/5123611)
Supplement: Supplementary file 2 [file 1]

Archive with 9 entries (9 files):
- 000339129_sm_ Table  1.pdf
- 000339129_sm_ Table 1.pdf
- 000339129_sm_Figure  1.pdf
- 000339129_sm_Figure 1.pdf
- 000339129_sm_Figure.pdf
- 000339129_sm_Table  1.pdf
- 000339129_sm_Table  2.pdf
- 000339129_sm_Table 1.pdf
- 000339129_sm_Table 2.pdf
