# Supplementary material
Source: publisher figshare collection journal article supplement (https://karger.figshare.com/articles/dataset/_/5123611)
Supplement: Supplementary file 2 [file 1 › 000339129_sm_ Table 1.pdf]

**Supplemental table 2 Outer nuclear thickness in both eyes**

| 1-mm segment               |        | horizontal cross section |       |         |        |         |       |
|----------------------------|--------|--------------------------|-------|---------|--------|---------|-------|
|                            |        | T outer                  | T mid | T inner | Center | N inner | N mid |
| <b>OD</b>                  | manual | 42                       | 47    | 41      | 79     | 54      | 46    |
|                            | auto   | 49.9                     | 49.9  | 44.0    | 72.9   | 56.4    | 54.2  |
| <b>OS</b>                  | manual | 53                       | 57    | 80      | 99     | 88      | 72    |
|                            | auto   | 60.1                     | 65.3  | 77.6    | 103.1  | 96.5    | 80.6  |
| <b>OD - OS (auto) (μm)</b> |        | -10.2                    | -15.4 | -33.6   | -30.2  | -40.1   | -26.4 |
| <b>OD / OS (auto) (%)</b>  |        | 83.0%                    | 76.4% | 56.7%   | 70.7%  | 58.4%   | 67.2% |

values are shown in μm, T: temporal, S: superior, N: nasal, I: inferior

| vertical cross section |         |         |        |         |         |
|------------------------|---------|---------|--------|---------|---------|
| N outer                | I outer | I inner | Center | S inner | S outer |
| 46                     | 42      | 36      | 89     | 63      | 58      |
| 48.3                   | 44.9    | 42.2    | 76.7   | 68.1    | 63.2    |
| 53                     | 58      | 71      | 95     | 76      | 68      |
| 59.9                   | 68.4    | 82.1    | 100.2  | 80.8    | 74.1    |
| -11.6                  | -23.5   | -39.9   | -23.5  | -12.7   | -10.9   |
| 80.6%                  | 65.6%   | 51.4%   | 76.5%  | 84.3%   | 85.3%   |
