# Supplementary material
Source: publisher figshare collection journal article supplement (https://karger.figshare.com/articles/dataset/_/5123611)
Supplement: Supplementary file 2 [file 1 › 000339129_sm_Figure 1.pdf]

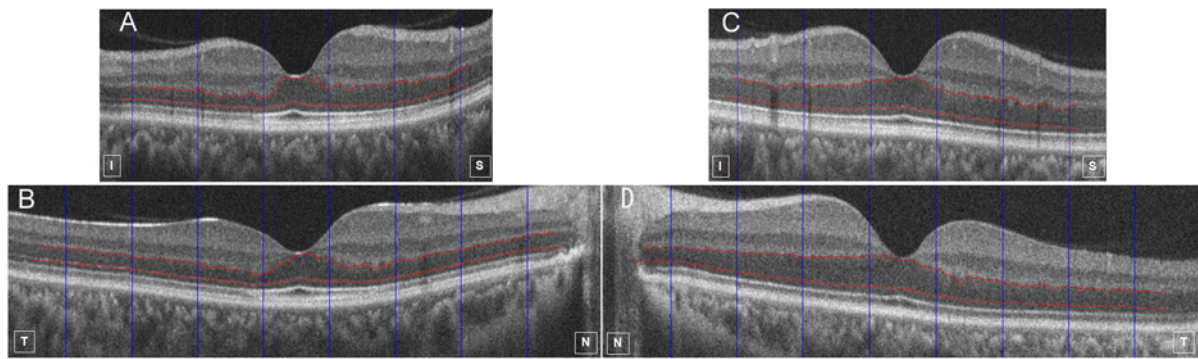

### Supplemental Figure 1

#### Manual analysis on the outer nuclear layer (ONL) thickness in both eyes

The thickness of the ONL, defined as the vertical distance between the highly reflective line corresponding to the external limiting membrane (ELM) and the midpoint of the transition between the highly reflective outer plexiform layer (OPL) and the less reflective ONL. The measurements were made at many points on the central horizontal and vertical B-scan cross-sections. A: vertical scan in the right eye, B: horizontal scan in the right eye, C: vertical scan in the left eye, D: horizontal scan in the left eye, I: inferior, S: superior, N: nasal, T: temporal.
