# Supplementary material
Source: publisher figshare collection journal article supplement (https://karger.figshare.com/articles/dataset/_/5123611)
Supplement: Supplementary file 2 [file 1 › 000339129_sm_Table 2.pdf]

**Supplemental table 2 Outer nuclear thickness in both eyes**

| 1-mm segment                            |        | horizontal cross section |       |         |        |         |       |
|-----------------------------------------|--------|--------------------------|-------|---------|--------|---------|-------|
|                                         |        | T outer                  | T mid | T inner | Center | N inner | N mid |
| <b>OD</b>                               | manual | 42                       | 47    | 41      | 79     | 54      | 46    |
|                                         | auto   | 49.9                     | 49.9  | 44.0    | 72.9   | 56.4    | 54.2  |
| <b>OS</b>                               | manual | 53                       | 57    | 80      | 99     | 88      | 72    |
|                                         | auto   | 60.1                     | 65.3  | 77.6    | 103.1  | 96.5    | 80.6  |
| <b>OD - OS</b> (auto) ( $\mu\text{m}$ ) |        | -10.2                    | -15.4 | -33.6   | -30.2  | -40.1   | -26.4 |
| <b>OD / OS</b> (auto) (%)               |        | 83.0%                    | 76.4% | 56.7%   | 70.7%  | 58.4%   | 67.2% |

values are shown in  $\mu\text{m}$ , T: temporal, S: superior, N: nasal, I: inferior

| vertical cross section |                |                |               |                |                |
|------------------------|----------------|----------------|---------------|----------------|----------------|
| <b>N</b> outer         | <b>I</b> outer | <b>I</b> inner | <b>Center</b> | <b>S</b> inner | <b>S</b> outer |
| 46                     | 42             | 36             | 89            | 63             | 58             |
| 48.3                   | 44.9           | 42.2           | 76.7          | 68.1           | 63.2           |
| 53                     | 58             | 71             | 95            | 76             | 68             |
| 59.9                   | 68.4           | 82.1           | 100.2         | 80.8           | 74.1           |
| -11.6                  | -23.5          | -39.9          | -23.5         | -12.7          | -10.9          |
| 80.6%                  | 65.6%          | 51.4%          | 76.5%         | 84.3%          | 85.3%          |
